# Supplementary material
Source: Springer Nature journal article supplement (http://www.springermedizin.de/resource/supplementary/12937_2010_353_MOESM2_ESM.pdf/25653194)

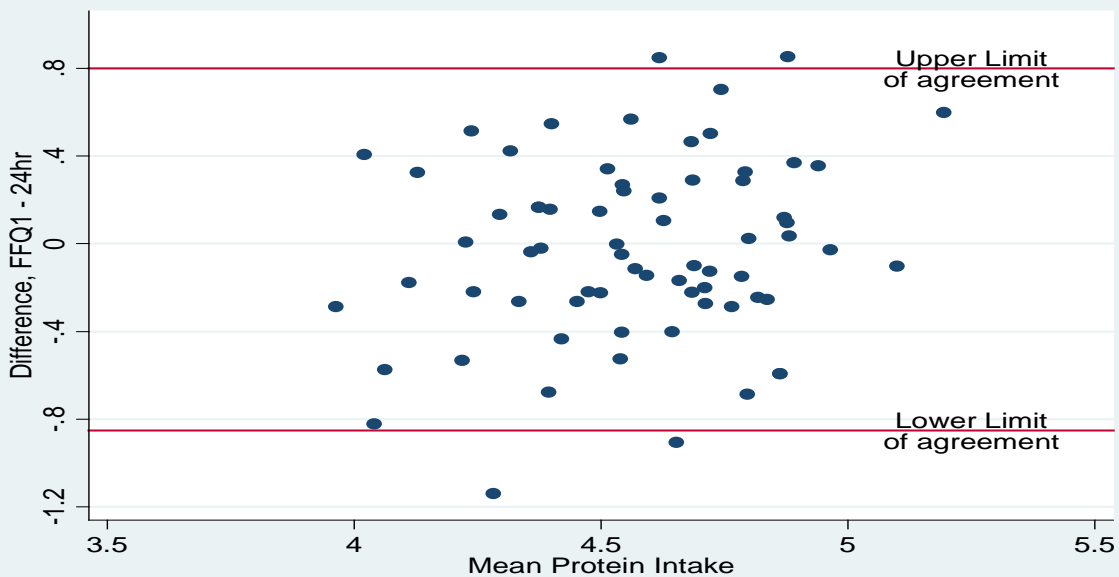

Supplement: MOESM2 [file 25653194]
